# Supplementary material for: Is acupuncture effective for knee osteoarthritis? A protocol for a systematic review and meta-analysis
Source: PubMed Central journal article supplement — BMJ Open. 2022 Jan 11;12(1):e052270. doi: 10.1136/bmjopen-2021-052270 (PMC8753400; doi:10.1136/bmjopen-2021-052270), 2022-01-11
Supplement: bmjopen-2021-052270supp002.pdf [file bmjopen-2021-052270supp002.pdf]

**Table 1 Search strategy used in the PubMed database**

| #  | Searches                                                                                                                                                                                                                                            |
|----|-----------------------------------------------------------------------------------------------------------------------------------------------------------------------------------------------------------------------------------------------------|
| 1  | Osteoarthritis, Knee[mesh]                                                                                                                                                                                                                          |
| 2  | Knee Osteoarthritides OR Knee Osteoarthritis OR Osteoarthritis of Knee OR Osteoarthritis of the Knee OR Osteoarthritis, Knee OR KOA[Title/Abstract]                                                                                                 |
| 3  | Patellofemoral Pain Syndrome[mesh]                                                                                                                                                                                                                  |
| 4  | Pain Syndrome, Patellofemoral OR Anterior Knee Pain Syndrome OR Patellofemoral Syndrome OR Patellofemoral Pain OR Pain, Patellofemoral OR Patellofemoral Pains[Title/Abstract]                                                                      |
| 5  | knee pain[Title/Abstract]                                                                                                                                                                                                                           |
| 6  | gonarthrosis[Title/Abstract]                                                                                                                                                                                                                        |
| 7  | OR/1-6                                                                                                                                                                                                                                              |
| 8  | Acupuncture[mesh]                                                                                                                                                                                                                                   |
| 9  | Pharmacopuncture[Title/Abstract]                                                                                                                                                                                                                    |
| 10 | Acupuncture Therapy[mesh]                                                                                                                                                                                                                           |
| 11 | Acupuncture Treatment OR Acupuncture Treatments OR Treatment, Acupuncture OR Therapy, Acupuncture OR Pharmacoacupuncture Treatment OR Treatment, Pharmacoacupuncture OR Pharmacoacupuncture Therapy OR Therapy, Pharmacoacupuncture[Title/Abstract] |
| 12 | Electroacupuncture[mesh]                                                                                                                                                                                                                            |
| 13 | Acupuncture Points[mesh]                                                                                                                                                                                                                            |
| 14 | Acupuncture Point OR Point, Acupuncture OR Points, Acupuncture OR Acupoints OR Acupoint[Title/Abstract]                                                                                                                                             |
| 15 | OR/8-14                                                                                                                                                                                                                                             |
| 16 | clinical[tiab]                                                                                                                                                                                                                                      |
| 17 | trial[tiab]                                                                                                                                                                                                                                         |
| 18 | 16 AND 17                                                                                                                                                                                                                                           |
| 19 | clinical trials as topic[mesh]                                                                                                                                                                                                                      |
| 20 | clinical trial[pt]                                                                                                                                                                                                                                  |
| 21 | random*[tiab]                                                                                                                                                                                                                                       |
| 22 | random allocation[mesh]                                                                                                                                                                                                                             |
| 23 | therapeutic use[sh]                                                                                                                                                                                                                                 |
| 24 | OR/18-23                                                                                                                                                                                                                                            |
| 25 | 7 AND 15 AND 24                                                                                                                                                                                                                                     |
