# Supplementary material for: Is acupuncture effective for knee osteoarthritis? A protocol for a systematic review and meta-analysis
Source: PubMed Central journal article supplement — BMJ Open. 2022 Jan 11;12(1):e052270. doi: 10.1136/bmjopen-2021-052270 (PMC8753400; doi:10.1136/bmjopen-2021-052270), 2022-01-11
Supplement: bmjopen-2021-052270supp003.pdf [file bmjopen-2021-052270supp003.pdf]

**Result of presearch in the PubMed database**

1. Osteoarthritis, Knee[mesh] Items found: 21,147
  2. Knee Osteoarthritis OR Knee Osteoarthritis OR Osteoarthritis of Knee OR Osteoarthritis of the Knee OR Osteoarthritis, Knee OR KOA[Title/Abstract] Items found: 40,291
  3. Patellofemoral Pain Syndrome[mesh] Items found: 934
  4. Pain Syndrome, Patellofemoral OR Anterior Knee Pain Syndrome OR Patellofemoral Syndrome OR Patellofemoral Pain OR Pain, Patellofemoral OR Patellofemoral Pains[Title/Abstract] Items found: 3,799
  5. knee pain[Title/Abstract] Items found: 8,083
  6. gonarthrosis[Title/Abstract] Items found: 1,095
  7. OR/1-6 Items found: 47,408
  8. Acupuncture[mesh] Items found: 1735
  9. Pharmacopuncture[Title/Abstract] Items found: 211
  10. Acupuncture Therapy[mesh] Items found: 25,321
  11. Acupuncture Treatment OR Acupuncture Treatments OR Treatment, Acupuncture OR Therapy, Acupuncture OR Pharmacoacupuncture Treatment OR Treatment, Pharmacoacupuncture OR Pharmacoacupuncture Therapy OR Therapy, Pharmacoacupuncture[Title/Abstract] Items found: 2996
  12. Electroacupuncture[mesh] Items found: 4128
  13. Acupuncture Points[mesh] Items found: 6934
  14. Acupuncture Point OR Point, Acupuncture OR Points, Acupuncture OR Acupoints OR Acupoint[Title/Abstract] Items found: 6,284
  15. OR/8-14 Items found: 27,954
  16. clinical[tiab] Items found: 3,720,276
  17. trial[tiab] Items found: 638,665
  18. 16 AND 17 Items found: 294,477
  19. clinical trials as topic[mesh] Items found: 353,132
  20. clinical trial[pt] Items found: 884,322
  21. random\*[tiab] Items found: 1,202,203
  22. random allocation[mesh] Items found: 104,737
  23. therapeutic use[sh] Items found: 4,516,532
  24. OR/18-23 Items found: 5,668,908
  25. 7 AND 15 AND 24 Items found: 397
- Final Result: 397 (By 28 February 2021)
